# Supplementary material
Source: PubMed Central journal article supplement (PMC5479431)
Supplement: NIHMS865537-supplement-supplementary_info.pdf [file NIHMS865537-supplement-supplementary_info.pdf]

# Supporting Information

## Protein-Ligand Scoring with Convolutional Neural Networks

Matthew Ragoza,<sup>†,‡</sup> Joshua Hochuli,<sup>‡,¶</sup> Elisa Idrobo,<sup>§</sup> Jocelyn Sunseri,<sup>||</sup> and David Ryan Koes<sup>\*,||</sup>

<sup>†</sup>*Department of Neuroscience, University of Pittsburgh, Pittsburgh, PA 15260*

<sup>‡</sup>*Department of Computer Science, University of Pittsburgh, Pittsburgh, PA 15260*

<sup>¶</sup>*Department of Biological Sciences, University of Pittsburgh, Pittsburgh, PA 15260*

<sup>§</sup>*Department of Computer Science, The College of New Jersey, Ewing, NJ 08628*

<sup>||</sup>*Department of Computational and Systems Biology, University of Pittsburgh, Pittsburgh, PA 15260*

E-mail: [dkoes@pitt.edu](mailto:dkoes@pitt.edu)

## Figures

|    |                                      |    |
|----|--------------------------------------|----|
| S1 | Reference model ROC curves . . . . . | 4  |
| S2 | Best RMSD pose for PDBbind . . . . . | 4  |
| S3 | Correlation with RMSD . . . . .      | 5  |
| S4 | Overall DUD-E ROC curves . . . . .   | 5  |
| S5 | ChEMBL ROC curves . . . . .          | 14 |
| S6 | MUV ROC curves . . . . .             | 16 |

## Tables

|     |                                            |    |
|-----|--------------------------------------------|----|
| S1  | Atom types . . . . .                       | 2  |
| S2  | Independent test set information . . . . . | 3  |
| S3  | DUD-E AUCs . . . . .                       | 6  |
| S4  | DUD-E ROC enrichment at 0.5% . . . . .     | 7  |
| S5  | DUD-E ROC enrichment at 1% . . . . .       | 8  |
| S6  | DUD-E ROC enrichment at 2% . . . . .       | 9  |
| S7  | DUD-E ROC enrichment at 5.0% . . . . .     | 10 |
| S8  | ChEMBL AUCs . . . . .                      | 11 |
| S9  | ChEMBL ROC enrichment at 0.5% . . . . .    | 11 |
| S10 | ChEMBL ROC enrichment at 1% . . . . .      | 12 |
| S11 | ChEMBL ROC enrichment at 2% . . . . .      | 12 |
| S12 | ChEMBL ROC enrichment at 5.0% . . . . .    | 13 |
| S13 | MUV AUCs . . . . .                         | 13 |
| S14 | MUV ROC enrichment at 0.5% . . . . .       | 15 |
| S15 | MUV ROC enrichment at 1% . . . . .         | 15 |
| S16 | MUV ROC enrichment at 2% . . . . .         | 15 |
| S17 | MUV ROC enrichment at 5.0% . . . . .       | 17 |

Table S1: Atom types used to define protein-ligand structures for CNN scoring.

| Type                           | Ligand | Receptor |
|--------------------------------|--------|----------|
| AliphaticCarbonXSHydrophobe    | Y      | Y        |
| AliphaticCarbonXSNonHydrophobe | Y      | Y        |
| AromaticCarbonXSHydrophobe     | Y      | Y        |
| AromaticCarbonXSNonHydrophobe  | Y      | Y        |
| Bromine                        | Y      | N        |
| Calcium                        | N      | Y        |
| Chlorine                       | Y      | N        |
| Fluorine                       | Y      | N        |
| Iodine                         | Y      | N        |
| Iron                           | N      | Y        |
| Magnesium                      | N      | Y        |
| Nitrogen                       | Y      | Y        |
| NitrogenXSAcceptor             | Y      | Y        |
| NitrogenXSDonor                | Y      | Y        |
| NitrogenXSDonorAcceptor        | Y      | Y        |
| Oxygen                         | Y      | N        |
| OxygenXSAcceptor               | Y      | Y        |
| OxygenXSDonorAcceptor          | Y      | Y        |
| Phosphorus                     | Y      | Y        |
| Sulfur                         | Y      | Y        |
| SulfurAcceptor                 | Y      | N        |
| Zinc                           | N      | Y        |

Table S2: Information about the PDB structures chosen to provide structural information for the selected test set targets. The PDB accession code, crystal ligand, affinity of the crystal ligand for the protein, and assay type from which the test set actives and decoys were derived are shown.

| MUV ID | PDB ID | Ligand | $K_i/IC_{50}$ (nM) | Assay type  |
|--------|--------|--------|--------------------|-------------|
| 600    | 1yow   | P0E    | N/A                | cell        |
| 692    | 1yow   | P0E    | N/A                | cell        |
| 859    | 5cxv   | 0HK    | N/A                | cell        |
| 852    | 4xe4   | NAG    | N/A                | biochemical |
| 548    | 3poo   | S69    | N/A                | biochemical |
| 832    | 1au8   | 0H8    | N/A                | biochemical |
| 689    | 2y6o   | 1N1    | 25                 | biochemical |
| 846    | 5exm   | 5ST    | N/A                | biochemical |
| 466    | 3v2y   | ML5    | 18-77              | cell        |

| ChEMBL ID | PDB ID | Ligand | $K_i/IC_{50}$ (nM) | Assay type  |
|-----------|--------|--------|--------------------|-------------|
| 10752     | 4kik   | KSA    | N/A                | biochemical |
| 11359     | 1mkd   | ZAR    | 160                | biochemical |
| 28        | 1hvy   | D16    | 290                | biochemical |
| 276       | 2qyk   | NPV    | 1-88               | biochemical |
| 10498     | 2xu1   | 424    | 22                 | biochemical |
| 11534     | 1ms6   | BLN    | 0.3                | biochemical |
| 10378     | 1csb   | EP0    | N/A                | biochemical |
| 219       | 4daj   | 0HK    | N/A                | biochemical |
| 11279     | 3ks9   | Z99    | 6800               | biochemical |
| 12968     | 4s0v   | SUV    | 0.35-12            | biochemical |
| 20014     | 1mq4   | ADP    | N/A                | biochemical |
| 11631     | 3v2y   | ML5    | 18-77              | biochemical |
| 18061     | 5ek0   | 5P2    | N/A                | biochemical |
| 12670     | 4xuf   | P30    | 1.3-8.8            | biochemical |

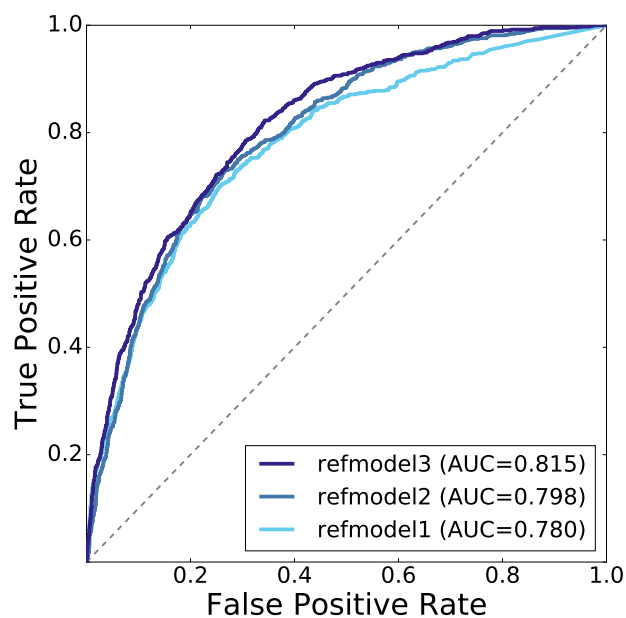

Figure S1: The cross-validation ROC curves for the three reference models used during model optimization.

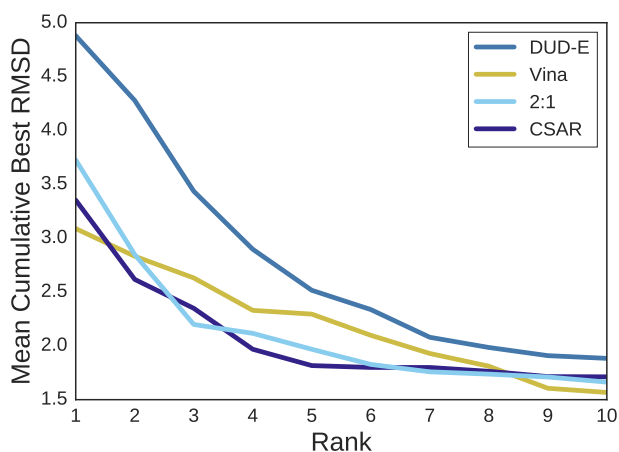

Figure S2: The best RMSD pose identified in the top ranked ligand poses averaged across all PDBbind core subset targets for each scoring method.

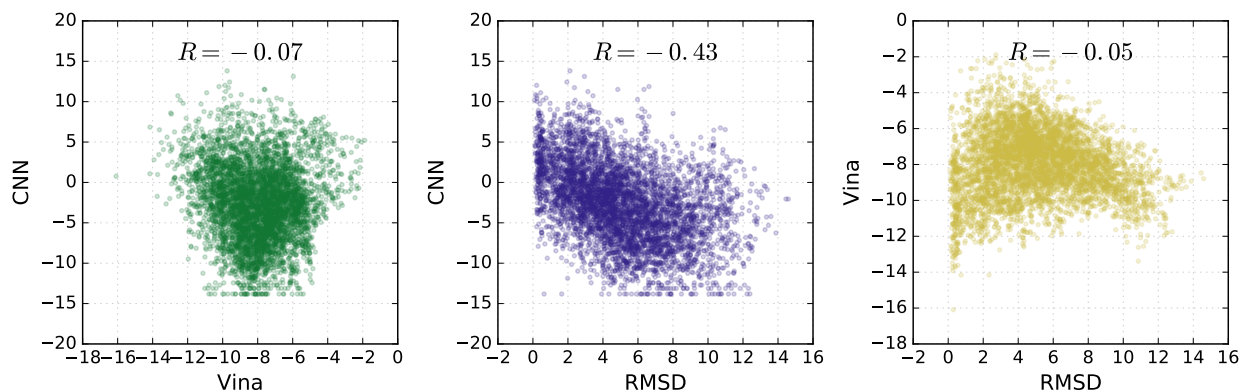

Figure S3: Pearson correlation between Vina, CNN, and RMSD from crystal pose for the CSAR dataset. A logit transformation has been applied to the CNN score, mapping it from probability to linear space, in order to more easily see the relationship. All generated poses are shown, including those with RMSD between 2 and 4 which were omitted from training.

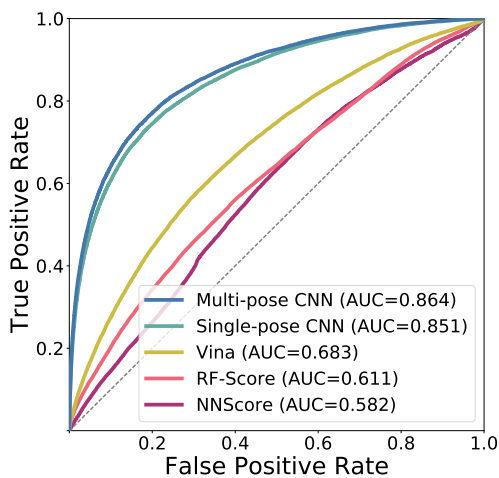

Figure S4: ROC curves for cross-validation virtual screening performance across the full DUD-E benchmark. Single-pose scoring distinguishes between active and inactive compounds using the top ranked pose identified by Vina while multi-pose scoring selects among all docked poses using the maximum CNN score.

Table S3: Cross-validation multipose DUD-E AUC for Vina, RF-Score (RF-S), NNScore (NNS), and CNN models trained using either only DUD-E docked poses or a combination, at a 2:1 ratio, of DUD-E poses and CSAR poses.

| Target | DUD E        | 2 1 D/C      | Vina         | RF S         | NNS          | Target | DUD E        | 2 1 D/C      | Vina         | RF S  | NNS   |
|--------|--------------|--------------|--------------|--------------|--------------|--------|--------------|--------------|--------------|-------|-------|
| aa2ar  | <b>0.941</b> | 0.874        | 0.655        | 0.494        | 0.568        | igflr  | <b>0.971</b> | 0.904        | 0.836        | 0.572 | 0.624 |
| abl1   | <b>0.933</b> | 0.892        | 0.752        | 0.693        | 0.626        | inha   | <b>0.812</b> | 0.789        | 0.715        | 0.658 | 0.539 |
| ace    | <b>0.799</b> | 0.715        | 0.564        | 0.668        | 0.761        | ital   | <b>0.943</b> | 0.774        | 0.600        | 0.608 | 0.481 |
| aces   | <b>0.861</b> | 0.749        | 0.777        | 0.681        | 0.645        | jak2   | <b>0.990</b> | 0.941        | 0.773        | 0.509 | 0.629 |
| ada    | <b>0.890</b> | 0.844        | 0.574        | 0.606        | 0.583        | kifl1  | 0.793        | 0.655        | <b>0.833</b> | 0.727 | 0.543 |
| ada17  | <b>0.939</b> | 0.818        | 0.683        | 0.659        | 0.693        | kit    | <b>0.968</b> | 0.822        | 0.779        | 0.656 | 0.563 |
| adrb1  | <b>0.876</b> | 0.871        | 0.743        | 0.679        | 0.584        | kith   | 0.528        | <b>0.851</b> | 0.732        | 0.547 | 0.673 |
| adrb2  | <b>0.862</b> | 0.758        | 0.722        | 0.630        | 0.615        | kpcb   | <b>0.856</b> | 0.839        | 0.755        | 0.679 | 0.486 |
| akt1   | <b>0.982</b> | 0.867        | 0.742        | 0.635        | 0.491        | lck    | <b>0.920</b> | 0.879        | 0.795        | 0.488 | 0.530 |
| akt2   | <b>0.986</b> | 0.845        | 0.779        | 0.563        | 0.649        | lkha4  | <b>0.941</b> | 0.887        | 0.823        | 0.634 | 0.350 |
| aldr   | 0.676        | 0.644        | <b>0.726</b> | 0.593        | 0.506        | mapk2  | <b>0.891</b> | 0.809        | 0.885        | 0.640 | 0.540 |
| ampc   | 0.632        | <b>0.736</b> | 0.608        | 0.349        | 0.566        | mcr    | 0.799        | <b>0.831</b> | 0.603        | 0.722 | 0.721 |
| andr   | <b>0.734</b> | 0.708        | 0.639        | 0.635        | 0.590        | met    | <b>0.969</b> | 0.883        | 0.798        | 0.744 | 0.585 |
| aofb   | 0.623        | 0.546        | <b>0.780</b> | 0.556        | 0.568        | mk01   | <b>0.928</b> | 0.856        | 0.852        | 0.682 | 0.615 |
| bace1  | <b>0.808</b> | 0.728        | 0.724        | 0.786        | 0.628        | mk10   | <b>0.922</b> | 0.788        | 0.745        | 0.559 | 0.570 |
| braf   | <b>0.988</b> | 0.920        | 0.841        | 0.632        | 0.556        | mk14   | <b>0.950</b> | 0.848        | 0.737        | 0.650 | 0.508 |
| cah2   | 0.621        | 0.755        | 0.589        | <b>0.813</b> | 0.447        | mmp13  | <b>0.966</b> | 0.874        | 0.645        | 0.667 | 0.638 |
| casp3  | <b>0.871</b> | 0.689        | 0.697        | 0.538        | 0.636        | mp2k1  | <b>0.825</b> | 0.767        | 0.550        | 0.562 | 0.679 |
| cdk2   | <b>0.842</b> | 0.781        | 0.716        | 0.560        | 0.587        | nos1   | <b>0.733</b> | 0.628        | 0.588        | 0.527 | 0.601 |
| comt   | 0.791        | <b>0.946</b> | 0.631        | 0.262        | 0.254        | nram   | <b>0.868</b> | 0.692        | 0.541        | 0.572 | 0.600 |
| cp2c9  | <b>0.884</b> | 0.791        | 0.622        | 0.576        | 0.534        | pa2ga  | 0.886        | <b>0.903</b> | 0.611        | 0.615 | 0.409 |
| cp3a4  | <b>0.901</b> | 0.775        | 0.597        | 0.579        | 0.515        | parp1  | 0.847        | <b>0.891</b> | 0.846        | 0.588 | 0.621 |
| cxcr4  | 0.707        | 0.533        | 0.597        | 0.691        | <b>0.799</b> | pde5a  | <b>0.934</b> | 0.902        | 0.620        | 0.578 | 0.660 |
| def    | <b>0.885</b> | 0.845        | 0.764        | 0.591        | 0.562        | pgh1   | <b>0.751</b> | 0.740        | 0.636        | 0.566 | 0.451 |
| dhil   | 0.600        | 0.646        | <b>0.771</b> | 0.621        | 0.683        | pgh2   | <b>0.840</b> | 0.832        | 0.735        | 0.570 | 0.456 |
| dpp4   | <b>0.739</b> | 0.666        | 0.625        | 0.603        | 0.674        | plk1   | <b>0.939</b> | 0.862        | 0.650        | 0.592 | 0.475 |
| drd3   | <b>0.773</b> | 0.714        | 0.754        | 0.671        | 0.604        | pnph   | <b>0.933</b> | 0.743        | 0.882        | 0.521 | 0.514 |
| dyr    | <b>0.866</b> | 0.832        | 0.769        | 0.553        | 0.681        | ppara  | <b>0.874</b> | 0.752        | 0.866        | 0.623 | 0.539 |
| egfr   | <b>0.966</b> | 0.908        | 0.629        | 0.541        | 0.547        | ppard  | <b>0.871</b> | 0.825        | 0.761        | 0.544 | 0.506 |
| esr1   | <b>0.930</b> | 0.906        | 0.807        | 0.640        | 0.504        | pparg  | <b>0.916</b> | 0.802        | 0.795        | 0.713 | 0.528 |
| esr2   | <b>0.924</b> | 0.897        | 0.790        | 0.659        | 0.504        | prgr   | <b>0.854</b> | 0.820        | 0.677        | 0.680 | 0.646 |
| fa10   | <b>0.905</b> | 0.861        | 0.777        | 0.805        | 0.555        | ptn1   | <b>0.856</b> | 0.847        | 0.831        | 0.638 | 0.564 |
| fa7    | 0.943        | <b>0.958</b> | 0.910        | 0.852        | 0.663        | pur2   | <b>0.946</b> | 0.907        | 0.911        | 0.734 | 0.833 |
| fabp4  | <b>0.905</b> | 0.781        | 0.774        | 0.673        | 0.302        | pygm   | <b>0.782</b> | 0.716        | 0.600        | 0.617 | 0.667 |
| fak1   | <b>0.986</b> | 0.958        | 0.801        | 0.708        | 0.490        | pyrd   | <b>0.920</b> | 0.830        | 0.768        | 0.773 | 0.489 |
| fkbl1a | 0.684        | 0.659        | <b>0.770</b> | 0.649        | 0.573        | reni   | <b>0.923</b> | 0.727        | 0.664        | 0.699 | 0.649 |
| fnta   | <b>0.909</b> | 0.805        | 0.658        | 0.746        | 0.570        | rock1  | <b>0.925</b> | 0.872        | 0.717        | 0.566 | 0.547 |
| fpps   | 0.980        | 0.098        | 0.286        | 0.211        | <b>0.999</b> | rxra   | 0.678        | <b>0.880</b> | 0.702        | 0.469 | 0.530 |
| gcr    | <b>0.902</b> | 0.848        | 0.612        | 0.590        | 0.644        | sahh   | <b>0.977</b> | 0.909        | 0.795        | 0.547 | 0.714 |
| glcm   | 0.610        | <b>0.782</b> | 0.492        | 0.503        | 0.597        | src    | <b>0.950</b> | 0.903        | 0.646        | 0.532 | 0.552 |
| gria2  | 0.781        | <b>0.791</b> | 0.746        | 0.560        | 0.619        | tgfr1  | <b>0.998</b> | 0.985        | 0.852        | 0.587 | 0.486 |
| grik1  | 0.656        | <b>0.687</b> | 0.593        | 0.452        | 0.679        | thb    | 0.832        | <b>0.890</b> | 0.750        | 0.610 | 0.392 |
| hdac2  | <b>0.936</b> | 0.813        | 0.850        | 0.814        | 0.572        | thrb   | <b>0.924</b> | 0.827        | 0.766        | 0.810 | 0.795 |
| hdac8  | <b>0.950</b> | 0.782        | 0.824        | 0.756        | 0.534        | try1   | <b>0.953</b> | 0.861        | 0.799        | 0.777 | 0.719 |
| hivint | <b>0.870</b> | 0.643        | 0.707        | 0.488        | 0.469        | trybl  | <b>0.902</b> | 0.845        | 0.707        | 0.715 | 0.660 |
| hivpr  | <b>0.891</b> | 0.677        | 0.721        | 0.763        | 0.578        | tysy   | <b>0.979</b> | 0.905        | 0.862        | 0.675 | 0.644 |
| hivrt  | <b>0.734</b> | 0.727        | 0.675        | 0.485        | 0.575        | urok   | <b>0.962</b> | 0.809        | 0.771        | 0.677 | 0.610 |
| hmdh   | 0.897        | <b>0.911</b> | 0.787        | 0.712        | 0.689        | vgfr2  | <b>0.967</b> | 0.859        | 0.751        | 0.717 | 0.496 |
| hs90a  | <b>0.909</b> | 0.836        | 0.272        | 0.372        | 0.445        | wee1   | 0.986        | <b>0.989</b> | 0.830        | 0.798 | 0.591 |
| hxx4   | <b>0.875</b> | 0.749        | 0.569        | 0.631        | 0.627        | xiap   | 0.830        | <b>0.849</b> | 0.730        | 0.731 | 0.801 |

Table S4: Cross-validation multipose DUD-E 0.5% ROC enrichment for Vina, RF-Score (RF-S), NNScore (NNS), and CNN models trained using either only DUD-E docked poses or a combination, at a 2:1 ratio, of DUD-E poses and CSAR poses.

| Target | DUD E          | 2 1 D/C       | Vina          | RF S          | NNS            | Target | DUD E          | 2 1            | Vina          | RF S          | NNS           |
|--------|----------------|---------------|---------------|---------------|----------------|--------|----------------|----------------|---------------|---------------|---------------|
| aa2ar  | <b>29.461</b>  | 11 203        | 2 490         | 2 588         | 0 415          | igflr  | <b>132.432</b> | 54 054         | 10 811        | 23 077        | 1 351         |
| abl1   | <b>96.133</b>  | 41 989        | 17 680        | 26 794        | 2 198          | inha   | 0 000          | 9 302          | <b>18.605</b> | 0 000         | 0 000         |
| ace    | <b>10.714</b>  | 1 429         | 2 143         | 7 692         | 6 186          | ital   | <b>48.175</b>  | 13 139         | 0 000         | 1 389         | 1 460         |
| aces   | 10 619         | 4 867         | <b>26.106</b> | 1 099         | 2 208          | jak2   | <b>168.224</b> | 95 327         | 7 477         | 13 223        | 1 869         |
| ada    | <b>19.355</b>  | 12 903        | 0 000         | 3 738         | 0 000          | kifl1  | 20 690         | 6 897          | 8 621         | <b>28.800</b> | 0 000         |
| adal7  | <b>73.308</b>  | 28 571        | 10 902        | 2 802         | 1 880          | kit    | <b>57.831</b>  | 19 277         | 3 614         | 11 236        | 2 410         |
| adrb1  | 20 408         | <b>22.041</b> | 3 265         | 0 717         | 2 429          | kith   | 0 000          | 0 000          | <b>24.561</b> | 3 175         | 0 000         |
| adrb2  | <b>25.217</b>  | 1 747         | 7 826         | 1 455         | 6 061          | kpcb   | 7 463          | 5 970          | <b>8.955</b>  | 0 000         | 0 000         |
| akt1   | <b>147.440</b> | 18 430        | 9 556         | 1 198         | 0 000          | lck    | <b>83.055</b>  | 49 642         | 7 637         | 5 996         | 0 476         |
| akt2   | <b>94.017</b>  | 22 222        | 17 094        | 0 000         | 1 709          | lkha4  | <b>54.118</b>  | 40 000         | 8 235         | 0 000         | 0 000         |
| aldr   | <b>15.094</b>  | 0 000         | 6 289         | 1 163         | 0 000          | mapk2  | <b>57.426</b>  | 7 921          | 17 822        | 0 000         | 0 000         |
| ampc   | <b>0.000</b>   | <b>0.000</b>  | <b>0.000</b>  | <b>0.000</b>  | <b>0.000</b>   | mcr    | 4 255          | 4 255          | 10 638        | 1 942         | <b>14.583</b> |
| andr   | 2 230          | 2 974         | <b>16.357</b> | 0 308         | 1 413          | met    | <b>121.687</b> | 66 265         | 4 819         | 35 724        | 1 205         |
| aofb   | 1 639          | 1 639         | <b>14.754</b> | 0 000         | 0 000          | mk01   | <b>43.038</b>  | 10 127         | 2 532         | 7 143         | 0 000         |
| bace1  | 9 187          | 10 601        | 4 947         | <b>29.909</b> | 2 827          | mk10   | <b>83.495</b>  | 40 385         | 9 709         | 5 217         | 0 000         |
| braf   | <b>139.474</b> | 27 632        | 26 316        | 16 078        | 1 316          | mk14   | <b>74.177</b>  | 32 180         | 4 853         | 13 938        | 1 038         |
| cah2   | 4 499          | 2 857         | 0 000         | <b>36.481</b> | 3 318          | mmp13  | <b>89.510</b>  | 22 727         | 3 846         | 7 724         | 2 763         |
| casp3  | <b>14.141</b>  | 4 040         | 1 010         | 0 952         | 3 030          | mp2k1  | <b>55.000</b>  | 1 667          | 0 000         | 0 000         | 6 667         |
| cdk2   | <b>34.672</b>  | 19 450        | 8 879         | 0 000         | 2 114          | nos1   | <b>16.000</b>  | 2 000          | 0 000         | 0 000         | 2 000         |
| comt   | 4 878          | <b>48.780</b> | 9 756         | 0 000         | 2 198          | nrnm   | <b>0.000</b>   | <b>0.000</b>   | <b>0.000</b>  | <b>0.000</b>  | <b>0.000</b>  |
| cp2c9  | <b>46.667</b>  | 8 333         | 5 000         | 10 145        | 0 000          | pa2ga  | <b>22.449</b>  | 10 204         | 2 041         | 0 000         | 0 000         |
| cp3a4  | <b>39.521</b>  | 13 174        | 2 395         | 4 082         | 0 000          | parp1  | 8 268          | 3 150          | <b>20.079</b> | 2 812         | 0 394         |
| cxcrc  | 0 000          | 0 000         | 0 000         | 0 000         | <b>5.000</b>   | pde5a  | 63 317         | <b>64.322</b>  | 6 030         | 1 357         | 1 471         |
| def    | <b>56.863</b>  | 27 451        | 15 686        | 9 091         | 0 000          | pgh1   | 11 458         | <b>15.544</b>  | 2 083         | 1 786         | 0 000         |
| dhi1   | 1 212          | 0 606         | 2 424         | <b>7.629</b>  | 2 424          | pgh2   | 21 911         | <b>28.637</b>  | 20 513        | 2 271         | 0 920         |
| dpp4   | <b>7.505</b>   | 1 876         | 1 501         | 1 358         | 3 752          | plk1   | <b>64.151</b>  | 54 717         | 3 774         | 5 996         | 7 547         |
| drd3   | 4 641          | 1 684         | <b>8.017</b>  | 5 062         | 1 235          | pnph   | <b>27.451</b>  | 0 000          | 19 608        | 0 000         | 3 306         |
| dyr    | <b>41.739</b>  | 33 043        | 4 348         | 0 905         | 0 866          | ppara  | <b>12.869</b>  | 6 971          | 6 971         | 0 990         | 1 072         |
| egfr   | <b>103.882</b> | 36 969        | 3 697         | 0 663         | 2 947          | ppard  | 9 167          | <b>14.167</b>  | 0 000         | 0 000         | 0 000         |
| esr1   | 21 636         | <b>47.895</b> | 16 359        | 0 000         | 1 042          | pparg  | <b>26.860</b>  | 11 570         | 7 025         | 4 671         | 1 653         |
| esr2   | 10 989         | <b>71.233</b> | 12 088        | 0 000         | 0 545          | prgr   | 6 826          | <b>11.604</b>  | 9 556         | 0 000         | 3 311         |
| fa10   | 38 433         | <b>39.179</b> | 6 343         | 23 166        | 1 117          | ptn1   | <b>55.385</b>  | 30 769         | 47 692        | 15 603        | 7 246         |
| fa7    | 21 053         | 31 579        | 17 544        | <b>34.146</b> | 0 000          | pur2   | 0 000          | 4 000          | 8 000         | 0 000         | <b>24.000</b> |
| fabp4  | <b>59.574</b>  | 0 000         | 4 255         | 0 000         | 0 000          | pygm   | 0 000          | 0 000          | 0 000         | 0 000         | <b>12.987</b> |
| fak1   | <b>156.000</b> | 138 000       | 2 000         | 0 000         | 0 000          | pyrd   | <b>59.459</b>  | 50 450         | 10 811        | 9 839         | 0 000         |
| fkbl1a | 0 000          | 0 000         | <b>9.009</b>  | 0 000         | 0 000          | reni   | 3 883          | 3 883          | <b>5.825</b>  | 1 754         | 1 869         |
| fnta   | <b>51.777</b>  | 11 506        | 1 354         | 8 006         | 2 024          | rock1  | <b>68.000</b>  | 34 000         | 2 000         | 0 000         | 2 000         |
| fpps   | 61 176         | 0 000         | 0 000         | 0 000         | <b>193.023</b> | rxra   | 0 000          | 1 527          | <b>47.328</b> | 0 000         | 0 000         |
| gcr    | 9 302          | <b>10.078</b> | 9 302         | 3 883         | 0 775          | sahh   | 0 000          | 22 222         | <b>25.397</b> | 0 000         | 0 000         |
| glcm   | 0 000          | <b>14.815</b> | 0 000         | 0 000         | 3 704          | src    | <b>98.084</b>  | 50 192         | 5 364         | 1 112         | 0 758         |
| gria2  | 1 266          | 13 924        | <b>17.722</b> | 3 529         | 15 190         | tgfr1  | <b>181.955</b> | 147 368        | 9 023         | 1 235         | 0 000         |
| grik1  | 2 000          | 0 000         | <b>4.000</b>  | 3 704         | 2 000          | thb    | 5 825          | <b>29.126</b>  | 23 301        | 0 000         | 0 000         |
| hdac2  | <b>130.055</b> | 2 186         | 18 579        | 2 771         | 1 081          | thrb   | <b>52.928</b>  | 8 677          | 3 471         | 9 815         | 6 508         |
| hdac8  | <b>161.905</b> | 3 571         | 29 762        | 3 371         | 1 176          | try1   | <b>75.724</b>  | 10 690         | 3 118         | 16 129        | 4 009         |
| hivint | 6 000          | <b>8.000</b>  | 4 000         | 0 000         | 0 000          | tryb1  | 6 757          | 4 054          | <b>13.514</b> | 7 701         | 1 351         |
| hivpr  | 11 632         | 1 498         | 5 629         | <b>43.467</b> | 0 373          | tysy   | <b>75.229</b>  | 42 202         | 27 523        | 1 681         | 1 835         |
| hivrt  | <b>8.358</b>   | 5 952         | 2 985         | 0 000         | 7 977          | urok   | <b>77.778</b>  | 7 407          | 9 877         | 3 352         | 0 000         |
| hmdh   | 14 118         | <b>50.588</b> | 5 882         | 10 000        | 2 353          | vgfr2  | <b>88.020</b>  | 41 565         | 11 247        | 8 153         | 0 000         |
| hs90a  | 4 545          | <b>20.455</b> | 0 000         | 0 000         | 4 545          | weel   | 106 931        | <b>124.752</b> | 15 842        | 0 000         | 0 000         |
| hxx4   | <b>63.043</b>  | 26 087        | 0 000         | 0 000         | 0 000          | xiap   | 0 000          | 0 000          | <b>8.081</b>  | 0 000         | 6 061         |

Table S5: Cross-validation multipose DUD-E 1.0% ROC enrichment for Vina, RF-Score (RF-S), NNScore (NNS), and CNN models trained using either only DUD-E docked poses or a combination, at a 2:1 ratio, of DUD-E poses and CSAR poses.

| Target | DUD E         | 2 1           | Vina          | RF S          | NNS           | Target | DUD E         | 2 1           | Vina          | RF S          | NNS           |
|--------|---------------|---------------|---------------|---------------|---------------|--------|---------------|---------------|---------------|---------------|---------------|
| aa2ar  | <b>24.066</b> | 9 544         | 3 112         | 2 033         | 0 622         | igflr  | <b>79.730</b> | 38 514        | 11 486        | 13 292        | 2 703         |
| abl1   | <b>68.508</b> | 28 177        | 9 945         | 13 397        | 2 747         | inha   | 2 326         | <b>13.953</b> | 9 302         | 0 000         | 0 000         |
| ace    | <b>7.500</b>  | 1 429         | 2 143         | 5 983         | 5 155         | ital   | <b>40.876</b> | 10 219        | 0 000         | 1 156         | 0 730         |
| aces   | 12 389        | 3 540         | <b>20.133</b> | 5 719         | 1 545         | jak2   | <b>85.981</b> | 58 879        | 10 280        | 8 264         | 2 804         |
| ada    | <b>29.032</b> | 19 355        | 0 000         | 3 738         | 0 000         | kifl1  | 11 207        | 3 448         | 11 207        | <b>17.600</b> | 0 000         |
| ada17  | <b>50.188</b> | 18 797        | 8 083         | 2 700         | 3 947         | kit    | <b>48.795</b> | 15 663        | 3 012         | 6 180         | 2 410         |
| adrb1  | <b>18.776</b> | 14 286        | 5 306         | 0 358         | 2 024         | kith   | 0 000         | 0 000         | <b>22.807</b> | 1 587         | 0 000         |
| adrb2  | <b>23.913</b> | 4 367         | 6 522         | 0 727         | 3 463         | kpcb   | 5 224         | 8 209         | <b>10.448</b> | 0 000         | 2 222         |
| akt1   | <b>84.642</b> | 13 993        | 7 509         | 1 796         | 0 000         | lck    | <b>53.699</b> | 32 458        | 7 160         | 3 640         | 0 714         |
| akt2   | <b>66.667</b> | 13 675        | 15 385        | 0 813         | 1 709         | lkha4  | <b>36.471</b> | 26 471        | 7 059         | 0 000         | 0 000         |
| aldr   | <b>11.321</b> | 1 887         | 3 145         | 1 163         | 0 000         | mapk2  | <b>35.644</b> | 6 931         | 13 861        | 1 818         | 1 980         |
| ampc   | <b>2.083</b>  | 0 000         | 0 000         | 0 000         | 0 000         | mcr    | 2 128         | 5 319         | 8 511         | 5 133         | <b>12.500</b> |
| andr   | 2 602         | 2 974         | <b>15.613</b> | 1 079         | 2 473         | met    | <b>74.096</b> | 36 747        | 6 627         | 22 662        | 1 205         |
| aofb   | 1 639         | 0 820         | <b>12.295</b> | 0 676         | 0 000         | mk01   | <b>45.570</b> | 15 190        | 3 797         | 4 762         | 1 266         |
| bace1  | 7 067         | 9 187         | 5 300         | <b>21.271</b> | 2 120         | mk10   | <b>55.340</b> | 28 846        | 6 796         | 5 217         | 0 962         |
| braf   | <b>78.289</b> | 24 342        | 17 763        | 14 430        | 0 658         | mk14   | <b>47.834</b> | 22 491        | 4 679         | 8 248         | 0 519         |
| cah2   | 4 294         | 4 082         | 0 000         | <b>22.265</b> | 2 133         | mmp13  | <b>57.867</b> | 17 308        | 3 671         | 6 808         | 2 073         |
| casp3  | <b>13.636</b> | 2 525         | 1 515         | 1 905         | 4 040         | mp2k1  | <b>43.333</b> | 1 667         | 0 833         | 0 769         | 5 833         |
| cdk2   | <b>25.793</b> | 15 222        | 6 131         | 0 759         | 1 480         | nos1   | <b>10.000</b> | 2 000         | 1 000         | 0 000         | 2 000         |
| comt   | 2 439         | <b>29.268</b> | 4 878         | 0 000         | 2 198         | nram   | <b>1.020</b>  | 0 000         | 0 000         | 0 000         | 0 000         |
| cp2c9  | <b>34.167</b> | 5 833         | 2 500         | 5 797         | 0 000         | pa2ga  | <b>21.429</b> | 15 306        | 1 020         | 0 000         | 0 000         |
| cp3a4  | <b>28.743</b> | 8 982         | 1 796         | 3 429         | 0 000         | parp1  | 8 661         | 4 331         | <b>13.583</b> | 2 758         | 1 181         |
| cxcr4  | <b>5.000</b>  | 0 000         | 0 000         | 0 000         | <b>5.000</b>  | pde5a  | <b>43.467</b> | 42 462        | 4 523         | 0 905         | 1 225         |
| def    | <b>32.353</b> | 23 529        | 11 765        | 4 545         | 1 961         | pgh1   | 8 333         | <b>11.399</b> | 3 125         | 1 475         | 1 005         |
| dhi1   | 2 424         | 1 515         | 3 030         | <b>6.118</b>  | 1 818         | pgh2   | 17 949        | <b>19.400</b> | 12 821        | 1 691         | 1 379         |
| dpp4   | <b>6.379</b>  | 2 251         | 1 313         | 1 097         | 3 377         | plk1   | <b>47.170</b> | 36 792        | 3 774         | 5 988         | 5 660         |
| drd3   | 4 641         | 2 105         | <b>5.907</b>  | 3 982         | 1 235         | pnph   | <b>31.373</b> | 0 980         | 13 725        | 0 000         | 2 479         |
| dysr   | <b>28.696</b> | 22 174        | 3 043         | 1 527         | 1 299         | ppara  | <b>11.796</b> | 5 362         | 8 847         | 0 743         | 2 145         |
| egfr   | <b>62.477</b> | 26 063        | 2 403         | 2 641         | 2 947         | ppard  | 7 500         | <b>11.667</b> | 1 667         | 1 158         | 0 417         |
| esr1   | 22 427        | <b>36.842</b> | 11 609        | 0 000         | 1 302         | pparg  | <b>21.901</b> | 7 851         | 6 198         | 3 633         | 1 240         |
| esr2   | 11 538        | <b>43.288</b> | 11 264        | 0 000         | 0 272         | prgr   | 6 826         | 8 191         | <b>8.532</b>  | 2 439         | 3 974         |
| fa10   | <b>34.328</b> | 26 866        | 5 784         | 15 725        | 0 931         | ptn1   | <b>31.538</b> | 23 077        | 30 000        | 11 115        | 4 348         |
| fa7    | 20 175        | <b>39.474</b> | 14 912        | 23 266        | 0 000         | pur2   | 4 000         | 2 000         | 12 000        | 0 000         | <b>14.000</b> |
| fabp4  | <b>29.787</b> | 0 000         | 4 255         | 0 000         | 0 000         | pygm   | 1 299         | 0 000         | 0 000         | 0 000         | <b>10.390</b> |
| fak1   | <b>87.000</b> | 73 000        | 5 000         | 1 835         | 0 000         | pyrd   | <b>42.342</b> | 31 532        | 8 108         | 11 864        | 0 000         |
| fkbl1a | 0 000         | 1 802         | <b>7.207</b>  | 1 653         | 0 000         | reni   | <b>8.738</b>  | 1 942         | 3 883         | 4 386         | 0 935         |
| fnta   | <b>38.579</b> | 8 122         | 1 861         | 8 551         | 1 518         | rock1  | <b>43.000</b> | 23 000        | 4 000         | 0 901         | 1 000         |
| fpps   | 45 882        | 0 000         | 0 000         | 0 000         | <b>98.837</b> | rxra   | 0 763         | 3 053         | <b>24.427</b> | 0 704         | 0 000         |
| gcr    | <b>12.791</b> | 10 078        | 6 977         | 2 215         | 2 326         | sahh   | <b>31.746</b> | 25 397        | 22 222        | 0 000         | 0 000         |
| glcm   | 1 852         | <b>18.519</b> | 0 000         | 0 000         | 1 852         | src    | <b>61.494</b> | 32 950        | 3 448         | 1 676         | 1 705         |
| gria2  | 2 532         | <b>13.291</b> | 12 658        | 4 118         | 10 127        | tgfr1  | <b>95.489</b> | 81 955        | 6 767         | 0 617         | 0 000         |
| grik1  | 4 000         | 2 000         | <b>5.000</b>  | 1 852         | 4 000         | thb    | 8 738         | <b>33.010</b> | 11 650        | 1 575         | 0 000         |
| hdac2  | <b>69.399</b> | 5 464         | 16 393        | 2 552         | 2 162         | thrb   | <b>39.262</b> | 10 846        | 4 555         | 7 977         | 6 508         |
| hdac8  | <b>83.929</b> | 4 167         | 26 190        | 3 371         | 0 588         | try1   | <b>56.793</b> | 12 027        | 2 895         | 10 148        | 3 563         |
| hivint | 4 000         | <b>5.000</b>  | 2 000         | 0 000         | 0 000         | trybl  | <b>8.108</b>  | 4 730         | <b>8.108</b>  | 7 528         | 0 676         |
| hivpr  | 12 195        | 1 124         | 6 004         | <b>25.149</b> | 0 187         | tysy   | <b>65.138</b> | 32 110        | 18 349        | 4 855         | 2 752         |
| hivrt  | <b>9.851</b>  | 5 655         | 2 388         | 0 252         | 5 413         | urok   | <b>53.704</b> | 9 877         | 8 642         | 2 235         | 0 000         |
| hmdh   | 15 882        | <b>37.059</b> | 4 706         | 5 556         | 1 765         | vgfr2  | <b>60.636</b> | 26 161        | 8 068         | 6 334         | 0 000         |
| hs90a  | 6 818         | <b>11.364</b> | 0 000         | 0 000         | 2 273         | weel   | <b>77.228</b> | 76 238        | 7 921         | 1 550         | 0 000         |
| hxx4   | <b>32.609</b> | 21 739        | 2 174         | 0 000         | 0 000         | xiap   | 2 020         | 5 051         | <b>11.111</b> | 0 000         | 4 040         |

Table S6: Cross-validation multipose DUD-E 2.0% ROC enrichment for Vina, RF-Score (RF-S), NNScore (NNS), and CNN models trained using either only DUD-E docked poses or a combination, at a 2:1 ratio, of DUD-E poses and CSAR poses.

| Target | DUD E         | 2 1           | Vina          | RF S          | NNS           | Target | DUD E         | 2 1           | Vina          | RF S          | NNS           |
|--------|---------------|---------------|---------------|---------------|---------------|--------|---------------|---------------|---------------|---------------|---------------|
| aa2ar  | <b>20.643</b> | 9 336         | 3 527         | 1 386         | 0 415         | igflr  | <b>43.243</b> | 25 000        | 9 797         | 7 692         | 2 027         |
| abl1   | <b>37.845</b> | 19 337        | 6 906         | 7 863         | 1 648         | inha   | 5 814         | <b>12.791</b> | 5 814         | 0 000         | 0 000         |
| ace    | <b>5.000</b>  | 0 714         | 1 607         | 4 647         | 4 467         | ital   | <b>28.467</b> | 8 029         | 0 365         | 2 778         | 0 365         |
| aces   | 11 283        | 3 540         | <b>14.270</b> | 6 339         | 1 104         | jak2   | <b>45.327</b> | 30 841        | 7 009         | 4 545         | 3 271         |
| ada    | <b>24.194</b> | 16 667        | 1 075         | 5 407         | 0 000         | kifl1  | 6 034         | 3 448         | 9 914         | <b>12.821</b> | 0 431         |
| ada17  | <b>33.459</b> | 13 346        | 6 485         | 3 976         | 4 229         | kit    | <b>31.627</b> | 10 843        | 4 518         | 3 972         | 1 506         |
| adrb1  | <b>16.122</b> | 12 245        | 5 714         | 1 804         | 1 417         | kith   | 1 754         | 2 632         | <b>14.912</b> | 1 587         | 0 877         |
| adrb2  | <b>15.870</b> | 5 240         | 4 565         | 0 364         | 2 165         | kpcb   | 5 597         | 7 463         | <b>10.075</b> | 0 697         | 2 222         |
| akt1   | <b>45.222</b> | 11 775        | 5 631         | 3 443         | 0 512         | lck    | <b>33.174</b> | 21 241        | 6 205         | 2 355         | 0 952         |
| akt2   | <b>39.316</b> | 8 974         | 11 538        | 0 813         | 2 564         | lkha4  | <b>22.059</b> | 18 824        | 4 412         | 1 562         | 0 294         |
| aldr   | <b>6.604</b>  | 2 516         | 3 459         | 1 453         | 0 314         | mapk2  | <b>22.772</b> | 7 426         | 13 861        | 3 182         | 1 485         |
| ampc   | <b>4.167</b>  | 1 042         | 1 042         | 0 000         | 1 042         | mcr    | 2 660         | 4 787         | 6 383         | 5 825         | <b>9.375</b>  |
| andr   | 2 788         | 3 903         | <b>11.338</b> | 1 249         | 1 413         | met    | <b>40.663</b> | 20 181        | 6 325         | 16 201        | 1 205         |
| aofb   | 2 459         | 0 410         | <b>8.197</b>  | 0 338         | 0 820         | mk01   | <b>26.582</b> | 15 190        | 5 696         | 4 167         | 3 165         |
| bace1  | 5 477         | 7 067         | 4 770         | <b>13.661</b> | 1 413         | mk10   | <b>31.068</b> | 17 308        | 3 883         | 3 043         | 1 442         |
| braf   | <b>42.434</b> | 19 408        | 11 184        | 10 602        | 1 645         | mk14   | <b>30.763</b> | 15 571        | 4 159         | 5 382         | 0 519         |
| cah2   | 2 863         | 5 204         | 0 307         | <b>12.479</b> | 1 540         | mmp13  | <b>35.577</b> | 12 413        | 3 147         | 5 499         | 1 727         |
| casp3  | <b>13.384</b> | 3 030         | 2 778         | 1 905         | 3 283         | mp2k1  | <b>23.750</b> | 2 500         | 0 417         | 0 769         | 2 917         |
| cdk2   | <b>16.808</b> | 11 099        | 5 603         | 0 948         | 1 374         | nos1   | <b>8.000</b>  | 2 500         | 2 500         | 0 909         | 2 000         |
| comt   | 2 439         | <b>21.951</b> | 2 439         | 0 000         | 1 648         | nram   | <b>1.531</b>  | 0 000         | 0 000         | 0 030         | <b>1.531</b>  |
| cp2c9  | <b>22.083</b> | 6 250         | 2 500         | 4 348         | 0 417         | pa2ga  | 16 837        | <b>19.388</b> | 0 510         | 2 427         | 1 531         |
| cp3a4  | <b>20.958</b> | 8 383         | 1 796         | 3 294         | 0 599         | parp1  | 7 283         | 7 579         | <b>8.465</b>  | 2 636         | 1 083         |
| cxcr4  | 5 000         | 0 000         | 0 000         | 0 000         | <b>8.750</b>  | pde5a  | <b>26.005</b> | 25 879        | 2 261         | 1 131         | 1 103         |
| def    | <b>20.098</b> | 17 647        | 7 843         | 2 384         | 1 961         | pgh1   | 7 552         | <b>8.549</b>  | 2 865         | 1 705         | 0 503         |
| dhi1   | 2 576         | 1 061         | <b>5.758</b>  | 5 352         | 1 515         | pgh2   | <b>13.170</b> | 12 587        | 8 392         | 1 579         | 0 805         |
| dpp4   | <b>5.159</b>  | 2 064         | 1 126         | 1 019         | 3 189         | plk1   | <b>31.132</b> | 22 170        | 4 245         | 5 556         | 4 245         |
| drd3   | 4 430         | 2 000         | <b>5.063</b>  | 4 867         | 1 440         | pnph   | <b>22.549</b> | 5 882         | 8 824         | 0 000         | 2 066         |
| dyr    | <b>17.826</b> | 14 130        | 3 913         | 1 145         | 1 948         | ppara  | <b>10.590</b> | 4 960         | 8 579         | 0 866         | 1 475         |
| egfr   | <b>37.431</b> | 18 669        | 2 495         | 3 020         | 3 039         | ppard  | 8 125         | <b>9.583</b>  | 2 083         | 2 098         | 0 625         |
| esr1   | 19 129        | <b>23.816</b> | 8 179         | 0 000         | 0 911         | pparg  | <b>19.215</b> | 7 231         | 5 269         | 3 573         | 1 240         |
| esr2   | 12 225        | <b>26.575</b> | 9 890         | 0 000         | 0 817         | prgr   | 6 314         | 6 997         | <b>8.532</b>  | 3 040         | 4 305         |
| fa10   | <b>24.440</b> | 17 817        | 5 410         | 10 846        | 0 838         | ptn1   | <b>18.846</b> | 16 923        | <b>18.846</b> | 10 708        | 2 899         |
| fa7    | 17 105        | <b>28.070</b> | 14 035        | 15 041        | 1 230         | pur2   | 9 000         | 8 000         | 12 000        | 0 000         | <b>13.000</b> |
| fabp4  | <b>17.021</b> | 1 064         | 6 383         | 2 922         | 0 000         | pygm   | 4 545         | 0 000         | 0 649         | 0 000         | <b>9.740</b>  |
| fak1   | <b>46.000</b> | 43 000        | 7 000         | 2 294         | 0 000         | pyrd   | <b>26.577</b> | 17 117        | 4 955         | 8 653         | 0 000         |
| fkbl1a | 0 901         | 0 901         | <b>5.856</b>  | 1 653         | 0 450         | reni   | <b>14.078</b> | 3 398         | 4 854         | 2 632         | 0 935         |
| ftna   | <b>24.112</b> | 7 530         | 2 961         | 6 239         | 1 433         | rock1  | <b>24.000</b> | 16 000        | 4 000         | 0 901         | 0 500         |
| fpps   | 34 118        | 1 176         | 0 000         | 0 000         | <b>49.419</b> | rxra   | 0 382         | 3 053         | <b>13.359</b> | 1 761         | 0 382         |
| gcr    | 10 016        | <b>11.240</b> | 3 876         | 1 582         | 2 907         | sahh   | <b>37.302</b> | 26 190        | 16 667        | 0 000         | 4 762         |
| glcm   | 1 852         | <b>14.815</b> | 0 000         | 0 000         | 2 778         | src    | <b>36.877</b> | 22 414        | 3 352         | 1 897         | 2 083         |
| gria2  | 5 696         | 7 595         | <b>8.544</b>  | 4 118         | 5 696         | tgfr1  | <b>48.496</b> | 46 617        | 6 015         | 0 617         | 0 000         |
| grik1  | <b>3.500</b>  | <b>3.500</b>  | <b>3.500</b>  | 0 926         | 2 000         | thb    | 11 165        | <b>24.757</b> | 9 709         | 1 181         | 0 971         |
| hdac2  | <b>36.885</b> | 6 011         | 11 202        | 4 301         | 2 703         | thrb   | <b>26.681</b> | 9 653         | 5 098         | 5 875         | 5 531         |
| hdac8  | <b>42.560</b> | 4 464         | 18 155        | 3 371         | 0 882         | try1   | <b>33.296</b> | 9 354         | 2 673         | 7 428         | 3 898         |
| hivint | 5 000         | <b>5.500</b>  | 1 000         | 0 000         | 0 000         | trybl  | <b>8.446</b>  | 6 419         | 5 743         | 6 938         | 1 351         |
| hivpr  | 11 445        | 1 404         | 5 910         | <b>15.027</b> | 0 560         | tysy   | <b>40.367</b> | 21 101        | 14 220        | 3 782         | 2 294         |
| hivrt  | <b>8.358</b>  | 6 845         | 2 388         | 0 658         | 4 274         | urok   | <b>30.864</b> | 8 025         | 7 716         | 1 676         | 0 926         |
| hmdh   | 15 588        | <b>25.294</b> | 4 118         | 3 611         | 1 765         | vgfr2  | <b>36.430</b> | 16 993        | 6 479         | 5 765         | 0 244         |
| hs90a  | <b>9.659</b>  | 8 523         | 0 000         | 0 000         | 1 136         | weel   | <b>44.554</b> | 42 574        | 5 941         | 5 259         | 0 495         |
| hxx4   | <b>23.370</b> | 15 217        | 2 717         | 0 521         | 0 000         | xiap   | 3 030         | 6 566         | <b>7.071</b>  | 0 000         | 4 040         |

Table S7: Cross-validation multipose DUD-E 5.0% ROC enrichment for Vina, RF-Score (RF-S), NNScore (NNS), and CNN models trained using either only DUD-E docked poses or a combination, at a 2:1 ratio, of DUD-E poses and CSAR poses.

| Target | DUD E         | 2 1           | Vina         | RF S         | NNS           | Target | DUD E         | 2 1           | Vina         | RF S   | NNS          |
|--------|---------------|---------------|--------------|--------------|---------------|--------|---------------|---------------|--------------|--------|--------------|
| aa2ar  | <b>13.527</b> | 8 133         | 2 988        | 0 961        | 0 373         | igflr  | <b>18.243</b> | 13 243        | 7 703        | 4 103  | 2 297        |
| abl1   | <b>17.127</b> | 12 265        | 5 193        | 5 055        | 1 099         | inha   | 5 116         | <b>8.372</b>  | 4 186        | 3 971  | 0 000        |
| ace    | 4 786         | 1 143         | 1 357        | 3 333        | <b>5.704</b>  | ital   | <b>15.036</b> | 5 839         | 0 730        | 1 806  | 0 292        |
| aces   | <b>8.319</b>  | 3 451         | 7 611        | 4 173        | 1 015         | jak2   | <b>19.065</b> | 14 766        | 5 607        | 2 645  | 2 617        |
| ada    | <b>11.613</b> | 9 247         | 1 075        | 3 172        | 0 215         | kifl1  | 3 621         | 1 724         | <b>7.759</b> | 6 997  | 0 862        |
| ada17  | <b>16.316</b> | 7 594         | 4 586        | 3 659        | 3 308         | kit    | <b>16.867</b> | 6 386         | 3 614        | 3 258  | 0 843        |
| adrb1  | <b>10.531</b> | 8 653         | 4 245        | 1 912        | 0 729         | kith   | 2 807         | 3 860         | <b>8.772</b> | 2 222  | 3 158        |
| adrb2  | <b>9.826</b>  | 4 454         | 4 435        | 0 872        | 1 385         | kpcb   | 5 970         | 6 119         | <b>6.866</b> | 2 723  | 1 185        |
| akt1   | <b>18.908</b> | 8 737         | 4 027        | 2 391        | 0 956         | lck    | <b>15.322</b> | 10 835        | 5 060        | 1 713  | 1 000        |
| akt2   | <b>18.632</b> | 7 350         | 7 350        | 1 463        | 2 222         | lkha4  | <b>13.176</b> | 11 647        | 5 176        | 2 485  | 0 118        |
| aldr   | <b>4.780</b>  | 2 013         | 3 396        | 1 047        | 0 503         | mapk2  | <b>11.881</b> | 5 941         | 10 297       | 1 273  | 1 188        |
| ampc   | <b>4.167</b>  | 1 667         | 1 667        | 1 154        | 0 833         | mcr    | 3 617         | 4 255         | 3 617        | 3 689  | <b>6.667</b> |
| andr   | 3 792         | 3 346         | <b>6.097</b> | 1 576        | 1 696         | met    | <b>16.988</b> | 10 000        | 5 422        | 7 643  | 1 205        |
| aofb   | 2 623         | 0 492         | <b>5.410</b> | 2 027        | 0 984         | mk01   | <b>15.190</b> | 10 633        | 7 595        | 3 893  | 3 544        |
| bacel  | 4 240         | 4 452         | 3 322        | <b>7.799</b> | 0 989         | mk10   | <b>12.816</b> | 10 000        | 3 495        | 2 087  | 1 346        |
| braf   | <b>18.947</b> | 10 789        | 7 237        | 5 562        | 1 184         | mk14   | <b>15.078</b> | 8 616         | 3 640        | 3 713  | 1 073        |
| cah2   | 2 822         | 5 551         | 0 695        | <b>6.085</b> | 1 232         | mmp13  | <b>17.028</b> | 8 462         | 2 727        | 3 792  | 1 796        |
| casp3  | <b>8.990</b>  | 2 424         | 2 727        | 1 727        | 3 131         | mp2k1  | <b>10.833</b> | 3 000         | 0 833        | 1 538  | 2 167        |
| cdk2   | <b>9.725</b>  | 6 681         | 4 482        | 1 022        | 1 184         | nos1   | <b>6.600</b>  | 1 200         | 2 000        | 0 695  | 2 200        |
| comt   | 3 415         | <b>17.073</b> | 1 951        | 0 000        | 0 879         | nram   | <b>2.653</b>  | 2 449         | 0 204        | 0 561  | 2 449        |
| cp2c9  | <b>11.833</b> | 6 833         | 2 000        | 2 754        | 0 667         | pa2ga  | 10 612        | <b>11.837</b> | 0 204        | 2 136  | 0 816        |
| cp3a4  | <b>12.455</b> | 5 868         | 2 036        | 2 143        | 0 479         | parp1  | 6 575         | <b>8.386</b>  | 5 752        | 2 285  | 1 181        |
| cxcr4  | 3 000         | 2 000         | 1 000        | 1 021        | <b>6.000</b>  | pde5a  | <b>13.568</b> | 12 161        | 1 407        | 1 644  | 1 471        |
| def    | <b>9.412</b>  | 7 451         | 6 471        | 1 818        | 1 765         | pgh1   | <b>5.417</b>  | 5 181         | 3 021        | 2 103  | 0 302        |
| dhil   | 2 242         | 1 152         | <b>4.364</b> | 3 106        | 2 182         | pgh2   | 8 298         | <b>9.099</b>  | 5 874        | 1 648  | 0 414        |
| dpp4   | <b>4.353</b>  | 1 951         | 1 126        | 1 259        | 2 477         | plk1   | <b>14.906</b> | 10 189        | 4 340        | 3 932  | 1 698        |
| drd3   | 4 008         | 1 979         | <b>4.093</b> | 3 603        | 1 276         | pnph   | <b>11.961</b> | 4 314         | 7 843        | 1 052  | 1 322        |
| dyr    | <b>9.913</b>  | 9 652         | 4 000        | 0 840        | 2 511         | ppara  | <b>7.882</b>  | 4 021         | 7 453        | 0 910  | 1 233        |
| egfr   | <b>17.671</b> | 11 054        | 2 181        | 2 653        | 2 578         | ppard  | 6 250         | <b>7.083</b>  | 2 667        | 1 699  | 0 583        |
| esr1   | 11 715        | <b>12.316</b> | 5 541        | 0 047        | 0 625         | pparg  | <b>12.190</b> | 5 620         | 4 917        | 3 329  | 1 198        |
| esr2   | 11 429        | <b>12.603</b> | 7 527        | 0 321        | 0 654         | prgr   | <b>5.666</b>  | 4 710         | 5 392        | 2 530  | 3 245        |
| fa10   | <b>13.022</b> | 9 403         | 4 254        | 7 199        | 0 968         | ptn1   | <b>10.000</b> | <b>10.000</b> | 9 538        | 5 716  | 2 174        |
| fa7    | 11 228        | <b>14.386</b> | 12 456       | 7 313        | 1 148         | pur2   | <b>14.000</b> | 7 600         | 10 400       | 0 741  | 7 200        |
| fabp4  | <b>12.766</b> | 1 702         | 7 234        | 2 182        | 0 426         | pygm   | <b>6.753</b>  | 3 896         | 1 558        | 0 250  | 5 714        |
| fak1   | <b>18.600</b> | 17 600        | 4 800        | 2 098        | 0 400         | pyrd   | <b>13.333</b> | 8 649         | 3 063        | 6 102  | 0 360        |
| fkb1a  | 2 342         | 1 982         | <b>3.784</b> | 1 488        | 0 541         | reni   | <b>9.515</b>  | 3 689         | 3 689        | 2 076  | 0 935        |
| fnta   | <b>12.623</b> | 5 854         | 2 910        | 3 515        | 1 282         | rock1  | <b>11.800</b> | 10 000        | 2 400        | 1 081  | 0 800        |
| fpps   | 18 118        | 0 471         | 0 000        | 0 000        | <b>19.767</b> | rxra   | 1 221         | 4 885         | <b>5.649</b> | 0 845  | 0 611        |
| ger    | <b>9.535</b>  | 7 674         | 3 876        | 1 409        | 2 481         | sahh   | <b>17.460</b> | 16 825        | 9 524        | 0 650  | 5 079        |
| glcm   | 2 593         | <b>8.148</b>  | 0 000        | 0 000        | 1 481         | src    | <b>16.628</b> | 12 529        | 2 490        | 1 696  | 1 667        |
| gria2  | <b>6.962</b>  | 6 203         | 5 823        | 2 588        | 3 038         | tgfr1  | <b>19.850</b> | 19 398        | 4 211        | 1 496  | 0 451        |
| grik1  | <b>3.800</b>  | 3 000         | 3 200        | 0 926        | 3 000         | thb    | 10 097        | <b>12.816</b> | 5 825        | 2 047  | 0 971        |
| hdac2  | <b>16.284</b> | 6 339         | 8 743        | 4 654        | 1 622         | thrb   | <b>13.883</b> | 7 505         | 3 905        | 4 867  | 6 117        |
| hdac8  | <b>17.262</b> | 5 000         | 9 405        | 3 068        | 0 824         | try1   | <b>16.080</b> | 7 572         | 3 608        | 5 182  | 3 653        |
| hivint | <b>8.800</b>  | 4 000         | 2 800        | 0 189        | 0 200         | trybl  | <b>9.054</b>  | 5 541         | 4 054        | 5 505  | 1 486        |
| hivpr  | <b>8.480</b>  | 1 798         | 4 728        | 7 438        | 0 896         | tysy   | <b>18.349</b> | 12 477        | 11 193       | 4 034  | 2 569        |
| hivrt  | <b>5.672</b>  | 5 357         | 2 269        | 0 856        | 2 336         | urok   | <b>15.926</b> | 7 160         | 6 049        | 1 676  | 0 988        |
| hmdh   | 10 353        | <b>11.882</b> | 3 647        | 2 222        | 2 118         | vgfr2  | <b>17.457</b> | 9 389         | 5 281        | 4 033  | 0 538        |
| hs90a  | <b>9.318</b>  | 5 455         | 0 455        | 0 194        | 0 455         | weel   | <b>19.010</b> | <b>19.010</b> | 3 762        | 11 008 | 0 396        |
| hxx4   | <b>11.522</b> | 6 739         | 1 304        | 0 208        | 0 435         | xiap   | 3 030         | <b>5.657</b>  | 4 444        | 2 638  | 3 636        |

Table S8: Multipose ChEMBL AUC for Vina, RF-Score (RF-S), NNScore (NNS), and CNN models trained using either only DUD-E docked poses or a combination, at a 2:1 ratio, of DUD-E poses and CSAR poses.

| Target | DUD-E        | 2:1 D/C      | Vina         | RF-Score     | NNScore |
|--------|--------------|--------------|--------------|--------------|---------|
| 10378  | <b>0.704</b> | 0.464        | 0.533        | 0.663        | 0.461   |
| 10498  | 0.729        | 0.481        | 0.578        | <b>0.744</b> | 0.521   |
| 10752  | <b>0.814</b> | 0.753        | 0.733        | 0.530        | 0.383   |
| 11279  | <b>0.828</b> | 0.501        | 0.536        | 0.485        | 0.386   |
| 11359  | <b>0.796</b> | 0.711        | 0.672        | 0.726        | 0.558   |
| 11534  | 0.758        | 0.545        | 0.569        | <b>0.759</b> | 0.540   |
| 11631  | <b>0.796</b> | 0.727        | 0.668        | 0.764        | 0.487   |
| 12670  | <b>0.880</b> | 0.749        | 0.718        | 0.674        | 0.483   |
| 12968  | 0.495        | 0.492        | 0.645        | <b>0.784</b> | 0.602   |
| 18061  | 0.722        | 0.662        | <b>0.740</b> | 0.712        | 0.493   |
| 20014  | <b>0.917</b> | 0.767        | 0.791        | 0.647        | 0.477   |
| 219    | 0.674        | <b>0.753</b> | 0.516        | 0.583        | 0.532   |
| 276    | <b>0.879</b> | 0.738        | 0.852        | 0.803        | 0.572   |
| 28     | <b>0.917</b> | 0.653        | 0.762        | 0.544        | 0.282   |

Table S9: Multipose ChEMBL 0.5% ROC enrichment for Vina, RF-Score (RF-S), NNScore (NNS), and CNN models trained using either only DUD-E docked poses or a combination, at a 2:1 ratio, of DUD-E poses and CSAR poses.

| Target | DUD-E          | 2:1 D/C       | Vina          | RF-Score      | NNScore |
|--------|----------------|---------------|---------------|---------------|---------|
| 10378  | 20.000         | 0.000         | 6.000         | <b>34.000</b> | 0.000   |
| 10498  | 34.000         | 2.000         | 4.000         | <b>38.000</b> | 2.000   |
| 10752  | <b>54.000</b>  | 12.000        | 18.000        | 10.000        | 0.000   |
| 11279  | <b>6.000</b>   | 0.000         | 0.000         | 0.000         | 2.000   |
| 11359  | <b>46.000</b>  | 4.000         | 6.000         | 25.565        | 0.000   |
| 11534  | 26.000         | 0.000         | 2.000         | <b>40.000</b> | 8.000   |
| 11631  | <b>26.000</b>  | 4.000         | 4.000         | 4.000         | 0.000   |
| 12670  | <b>72.000</b>  | 16.000        | 10.000        | 16.180        | 0.000   |
| 12968  | 0.000          | 0.000         | <b>8.000</b>  | 0.000         | 0.000   |
| 18061  | 8.000          | 4.000         | 14.000        | <b>18.000</b> | 0.000   |
| 20014  | <b>100.000</b> | 34.000        | 12.000        | 6.000         | 6.000   |
| 219    | 8.081          | <b>10.101</b> | <b>10.101</b> | 5.263         | 2.632   |
| 276    | <b>90.000</b>  | 12.000        | 16.000        | 25.055        | 0.000   |
| 28     | <b>80.000</b>  | 8.000         | 24.000        | 2.000         | 0.000   |

Table S10: Multipose ChEMBL 1.0% ROC enrichment for Vina, RF-Score (RF-S), NNScore (NNS), and CNN models trained using either only DUD-E docked poses or a combination, at a 2:1 ratio, of DUD-E poses and CSAR poses.

| Target | DUD-E         | 2:1 D/C      | Vina          | RF-Score      | NNScore |
|--------|---------------|--------------|---------------|---------------|---------|
| 10378  | 13.000        | 0.000        | 4.000         | <b>17.000</b> | 0.000   |
| 10498  | 20.000        | 2.000        | 3.000         | <b>22.000</b> | 2.000   |
| 10752  | <b>33.000</b> | 13.000       | 12.000        | 7.000         | 2.000   |
| 11279  | <b>7.000</b>  | 0.000        | 0.000         | 0.000         | 2.000   |
| 11359  | <b>33.000</b> | 6.000        | 7.000         | 19.000        | 0.000   |
| 11534  | 16.000        | 0.000        | 1.000         | <b>25.475</b> | 6.000   |
| 11631  | <b>19.000</b> | 3.000        | 6.000         | 4.000         | 1.000   |
| 12670  | <b>44.000</b> | 13.000       | 10.000        | 12.000        | 0.000   |
| 12968  | 1.000         | 1.000        | <b>4.000</b>  | 3.000         | 0.000   |
| 18061  | 9.000         | 6.000        | <b>12.000</b> | 10.000        | 0.000   |
| 20014  | <b>55.000</b> | 21.000       | 8.000         | 4.000         | 6.000   |
| 219    | <b>8.081</b>  | <b>8.081</b> | 7.071         | 7.895         | 5.263   |
| 276    | <b>55.000</b> | 11.000       | 14.000        | 17.000        | 0.000   |
| 28     | <b>44.000</b> | 4.000        | 20.000        | 1.360         | 0.000   |

Table S11: Multipose ChEMBL 2.0% ROC enrichment for Vina, RF-Score (RF-S), NNScore (NNS), and CNN models trained using either only DUD-E docked poses or a combination, at a 2:1 ratio, of DUD-E poses and CSAR poses.

| Target | DUD-E         | 2:1 D/C      | Vina         | RF-Score      | NNScore |
|--------|---------------|--------------|--------------|---------------|---------|
| 10378  | <b>10.000</b> | 0.500        | 3.000        | 9.500         | 0.500   |
| 10498  | 13.500        | 1.000        | 3.000        | <b>15.000</b> | 1.500   |
| 10752  | <b>18.500</b> | 9.500        | 7.000        | 7.000         | 1.500   |
| 11279  | <b>6.500</b>  | 0.000        | 0.000        | 0.000         | 1.000   |
| 11359  | <b>22.000</b> | 5.500        | 5.500        | 11.500        | 0.000   |
| 11534  | 10.500        | 1.000        | 1.500        | <b>16.000</b> | 4.000   |
| 11631  | <b>12.500</b> | 2.500        | 4.000        | 3.500         | 1.000   |
| 12670  | <b>25.000</b> | 11.000       | 8.000        | 8.000         | 0.500   |
| 12968  | 0.500         | 1.500        | <b>3.000</b> | 2.000         | 0.000   |
| 18061  | 5.500         | 4.500        | <b>8.000</b> | 6.500         | 0.000   |
| 20014  | <b>32.000</b> | 12.500       | 6.000        | 4.000         | 3.500   |
| 219    | 4.545         | <b>8.081</b> | 4.040        | 6.579         | 3.947   |
| 276    | <b>30.500</b> | 6.000        | 11.000       | 10.617        | 0.500   |
| 28     | <b>26.500</b> | 3.000        | 13.000       | 2.000         | 0.000   |

Table S12: Multipose ChEMBL 5.0% ROC enrichment for Vina, RF-Score (RF-S), NNScore (NNS), and CNN models trained using either only DUD-E docked poses or a combination, at a 2:1 ratio, of DUD-E poses and CSAR poses.

| Target | DUD-E         | 2:1 D/C      | Vina         | RF-Score     | NNScore |
|--------|---------------|--------------|--------------|--------------|---------|
| 10378  | <b>6.000</b>  | 1.000        | 2.600        | 4.600        | 1.200   |
| 10498  | <b>7.200</b>  | 1.800        | 3.000        | 6.600        | 1.000   |
| 10752  | <b>9.200</b>  | 6.800        | 5.600        | 3.800        | 1.000   |
| 11279  | <b>6.600</b>  | 0.600        | 0.000        | 0.000        | 1.200   |
| 11359  | <b>10.200</b> | 5.000        | 3.800        | 6.600        | 0.200   |
| 11534  | 5.600         | 1.000        | 1.600        | <b>8.109</b> | 2.000   |
| 11631  | <b>7.200</b>  | 2.800        | 4.200        | 3.800        | 1.000   |
| 12670  | <b>13.200</b> | 7.400        | 5.600        | 5.400        | 1.000   |
| 12968  | 0.200         | 0.800        | <b>4.600</b> | 2.064        | 0.200   |
| 18061  | <b>5.600</b>  | 2.800        | 5.400        | 4.617        | 0.000   |
| 20014  | <b>14.800</b> | 7.800        | 5.600        | 2.400        | 1.800   |
| 219    | 3.838         | <b>5.253</b> | 3.030        | 4.737        | 2.632   |
| 276    | <b>13.800</b> | 4.000        | 8.200        | 7.200        | 1.400   |
| 28     | <b>12.800</b> | 3.000        | 8.200        | 1.400        | 0.000   |

Table S13: Multipose MUV AUC for Vina, RF-Score (RF-S), NNScore (NNS), and CNN models trained using either only DUD-E docked poses or a combination, at a 2:1 ratio, of DUD-E poses and CSAR poses.

| Target | DUD-E        | 2:1 D/C | Vina         | RF-S         | NNS          |
|--------|--------------|---------|--------------|--------------|--------------|
| 466    | <b>0.663</b> | 0.492   | 0.593        | 0.592        | 0.417        |
| 548    | <b>0.791</b> | 0.697   | 0.460        | 0.345        | 0.365        |
| 600    | 0.559        | 0.489   | 0.578        | <b>0.640</b> | 0.528        |
| 689    | 0.514        | 0.377   | 0.596        | 0.562        | <b>0.601</b> |
| 692    | <b>0.480</b> | 0.447   | 0.413        | 0.429        | 0.457        |
| 832    | 0.402        | 0.495   | <b>0.610</b> | 0.610        | 0.339        |
| 846    | 0.384        | 0.504   | <b>0.655</b> | 0.458        | 0.412        |
| 852    | 0.348        | 0.501   | <b>0.515</b> | 0.405        | 0.374        |
| 859    | 0.560        | 0.488   | 0.517        | <b>0.571</b> | 0.474        |

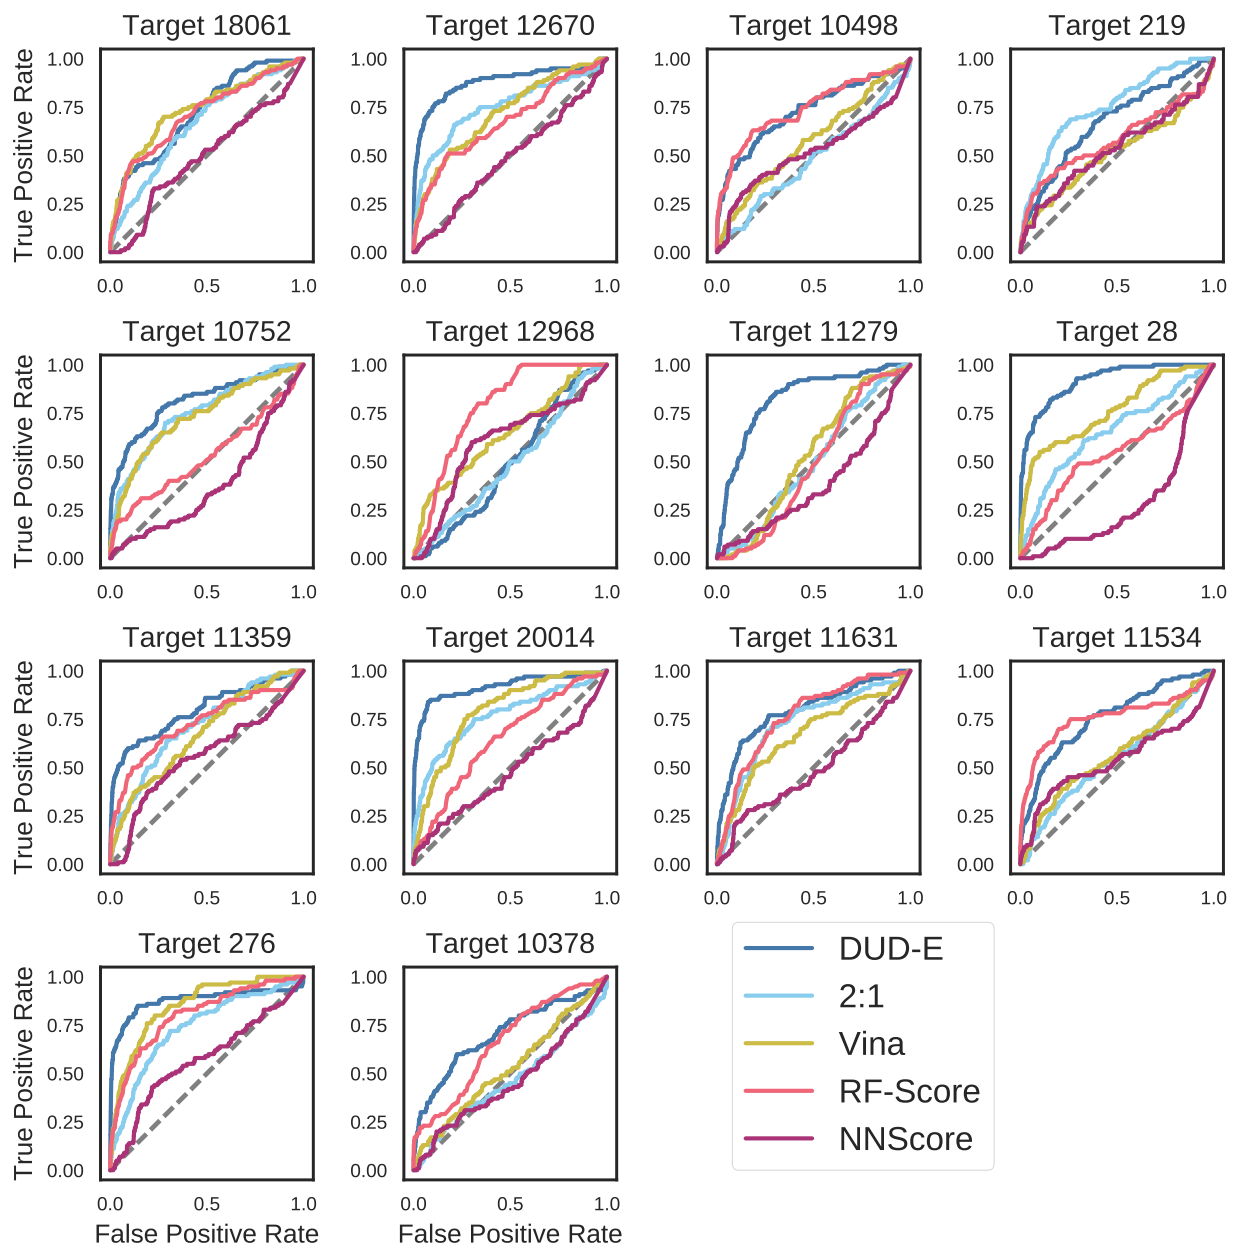

Figure S5: Per-target ROC curves using DUD-E CNN, 2:1 DUD-E/CSAR CNN, Vina, RF-Score, and NNScore for the ChEMBL test set.

Table S14: Multipose MUV 0.5% ROC enrichment for Vina, RF-Score (RF-S), NNScore (NNS), and CNN models trained using either only DUD-E docked poses or a combination, at a 2:1 ratio, of DUD-E poses and CSAR poses.

| Target | DUD-E        | 2:1 D/C      | Vina         | RF-S         | NNS          |
|--------|--------------|--------------|--------------|--------------|--------------|
| 466    | <b>0.000</b> | <b>0.000</b> | <b>0.000</b> | <b>0.000</b> | <b>0.000</b> |
| 548    | 0.000        | <b>6.667</b> | 0.000        | 0.000        | 0.000        |
| 600    | <b>0.000</b> | <b>0.000</b> | <b>0.000</b> | <b>0.000</b> | <b>0.000</b> |
| 689    | <b>6.667</b> | 0.000        | 0.000        | 0.000        | 0.000        |
| 692    | <b>0.000</b> | <b>0.000</b> | <b>0.000</b> | <b>0.000</b> | <b>0.000</b> |
| 832    | <b>0.000</b> | <b>0.000</b> | <b>0.000</b> | <b>0.000</b> | <b>0.000</b> |
| 846    | <b>6.667</b> | 0.000        | 0.000        | 0.000        | 0.000        |
| 852    | <b>0.000</b> | <b>0.000</b> | <b>0.000</b> | <b>0.000</b> | <b>0.000</b> |
| 859    | <b>0.000</b> | <b>0.000</b> | <b>0.000</b> | <b>0.000</b> | <b>0.000</b> |

Table S15: Multipose MUV 1.0% ROC enrichment for Vina, RF-Score (RF-S), NNScore (NNS), and CNN models trained using either only DUD-E docked poses or a combination, at a 2:1 ratio, of DUD-E poses and CSAR poses.

| Target | DUD-E        | 2:1          | Vina         | RF-S         | NNS          |
|--------|--------------|--------------|--------------|--------------|--------------|
| 466    | 0.000        | 3.333        | 3.333        | <b>6.667</b> | 0.000        |
| 548    | <b>6.667</b> | <b>6.667</b> | 0.000        | 0.000        | 0.000        |
| 600    | <b>0.000</b> | <b>0.000</b> | <b>0.000</b> | <b>0.000</b> | <b>0.000</b> |
| 689    | <b>3.333</b> | 0.000        | <b>3.333</b> | <b>3.333</b> | <b>3.333</b> |
| 692    | 0.000        | 0.000        | 0.000        | <b>3.333</b> | 0.000        |
| 832    | 0.000        | 0.000        | <b>3.333</b> | 0.000        | 0.000        |
| 846    | <b>3.333</b> | 0.000        | 0.000        | 0.000        | 0.000        |
| 852    | <b>0.000</b> | <b>0.000</b> | <b>0.000</b> | <b>0.000</b> | <b>0.000</b> |
| 859    | <b>0.000</b> | <b>0.000</b> | <b>0.000</b> | <b>0.000</b> | <b>0.000</b> |

Table S16: Multipose MUV 2.0% ROC enrichment for Vina, RF-Score (RF-S), NNScore (NNS), and CNN models trained using either only DUD-E docked poses or a combination, at a 2:1 ratio, of DUD-E poses and CSAR poses.

| Target | DUD-E        | 2:1          | Vina         | RF-S         | NNS          |
|--------|--------------|--------------|--------------|--------------|--------------|
| 466    | 1.667        | 1.667        | <b>3.333</b> | <b>3.333</b> | 0.000        |
| 548    | <b>6.667</b> | <b>6.667</b> | 0.000        | 0.000        | 0.000        |
| 600    | 0.000        | 0.000        | <b>5.000</b> | 0.000        | 0.000        |
| 689    | <b>1.667</b> | 0.000        | <b>1.667</b> | <b>1.667</b> | <b>1.667</b> |
| 692    | 0.000        | 0.000        | 0.000        | <b>1.667</b> | 0.000        |
| 832    | 0.000        | 0.000        | <b>5.000</b> | 0.000        | 1.667        |
| 846    | <b>1.667</b> | <b>1.667</b> | 0.000        | 0.000        | 0.000        |
| 852    | <b>0.000</b> | <b>0.000</b> | <b>0.000</b> | <b>0.000</b> | <b>0.000</b> |
| 859    | 0.000        | 0.000        | <b>1.667</b> | <b>1.667</b> | 0.000        |

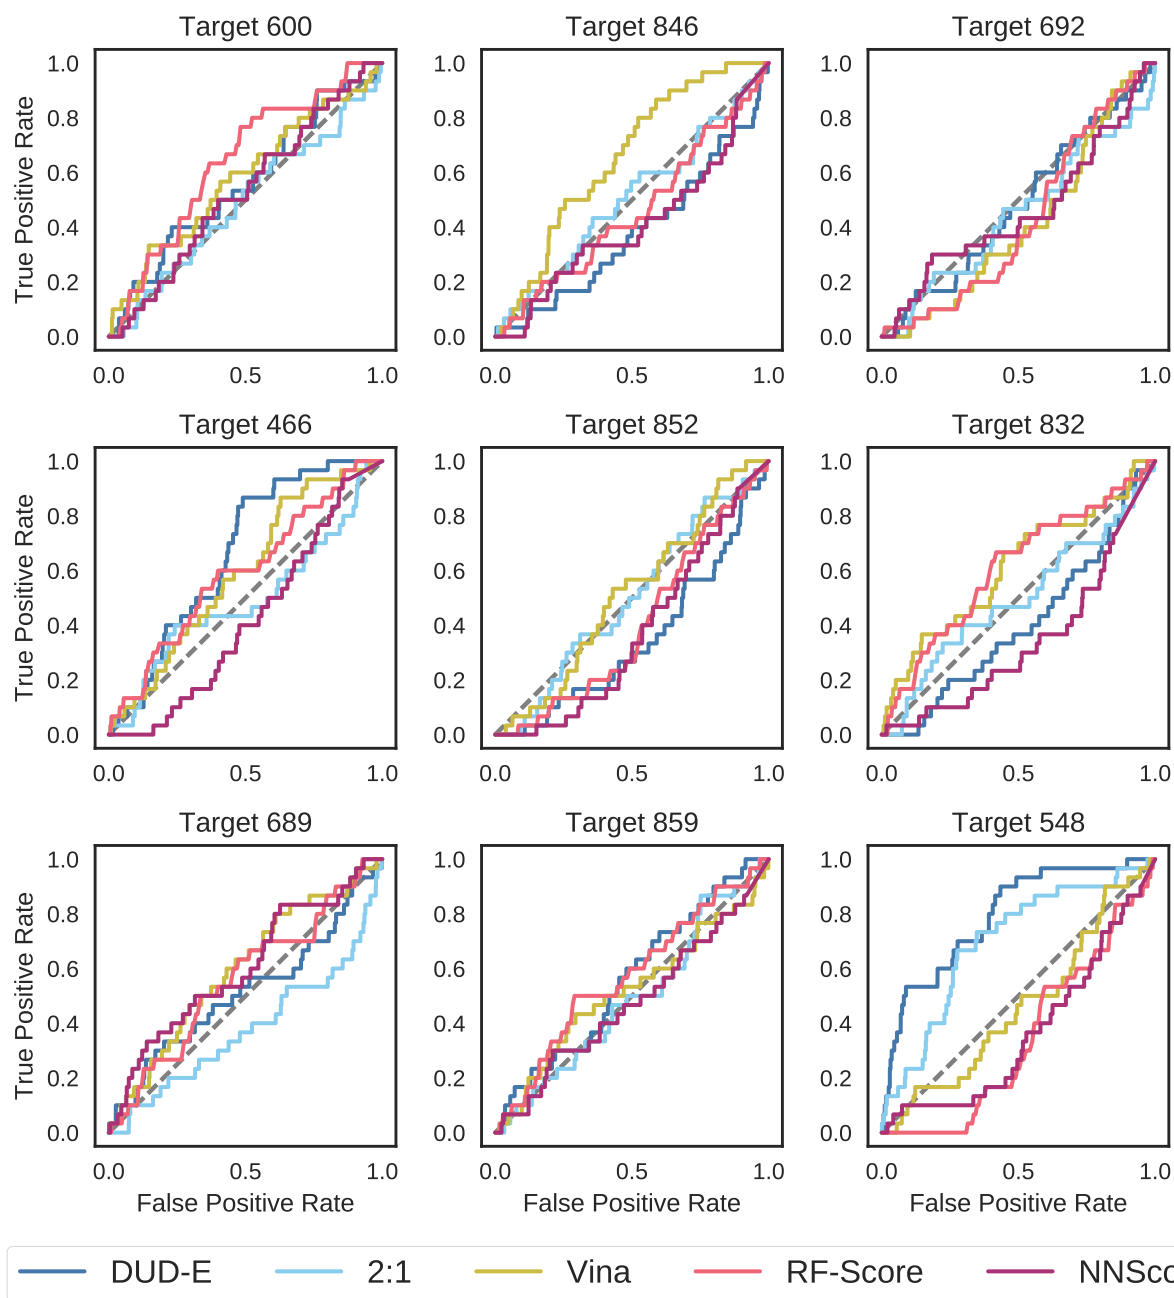

Figure S6: Per-target ROC curves using DUD-E CNN, 2:1 DUD-E/CSAR CNN, Vina, RF-Score and NNScore for the MUV test set.

Table S17: Multipose MUV 5.0% ROC enrichment for Vina, RF-Score (RF-S), NNScore (NNS), and CNN models trained using either only DUD-E docked poses or a combination, at a 2:1 ratio, of DUD-E poses and CSAR poses.

| Target | DUD-E        | 2:1          | Vina         | RF-S         | NNS          |
|--------|--------------|--------------|--------------|--------------|--------------|
| 466    | 1.333        | 0.667        | 1.333        | <b>2.000</b> | 0.000        |
| 548    | <b>6.667</b> | 2.667        | 0.000        | 0.000        | 1.333        |
| 600    | 1.333        | 0.000        | <b>2.667</b> | 1.333        | 0.000        |
| 689    | <b>2.000</b> | 0.000        | <b>2.000</b> | 1.333        | <b>2.000</b> |
| 692    | 0.000        | 0.000        | 0.000        | <b>0.667</b> | <b>0.667</b> |
| 832    | 0.000        | 0.000        | <b>3.333</b> | 2.148        | 0.667        |
| 846    | 0.667        | <b>1.333</b> | 0.667        | 0.667        | 0.000        |
| 852    | 0.000        | 0.000        | <b>0.667</b> | 0.000        | 0.000        |
| 859    | <b>2.000</b> | 0.667        | 1.333        | 1.333        | 1.333        |
